# Supplementary material
Source: Springer Nature journal article supplement (https://www.springermedizin.de/resource/supplementary/12913_2013_2768_MOESM2_ESM.pdf/9531390)
Supplement: MOESM2 [file 9531390]

On arrival at participating site parent/carer of children  $\geq 3$  months and  $< 16$  years are identified by clinician and given information about the study  
Clinicians record reasons for those children who declined to participate or whom they missed an opportunity to recruit

Parent/carer & child see clinician who:

- Answers questions about the study
- Assesses eligibility
- Initiates consent process
- Records diagnostic & examination information
- Gives symptom diary (Bristol centre only)
- Takes throat swab (Bristol centre only)

Parent/carer completes consent form and returns to clinician or to local study centre in FREEPOST envelope. Bristol study centre contacted if any questions regarding study or consent

Management according to usual clinical practice

No further data collection or baseline data use if consent form not received at Bristol study centre

7, 14, 21, 28 day symptom diary follow-up (or until cough resolved) by telephone by Bristol centre administrators (Bristol centre only)

30 day medical notes review (for all children)

#### CENTRAL LABORATORY

- Custom made throat swabs (2 polyurethane tipped swabs on plastic shafts with break points mounted on a single plug) transferred to special vials (bacterial -  $\Sigma$  TRANSWAB liquid amies medium; viral -  $\Sigma$  Virocult virus transport medium) and TARGET labels and packaging.
- Sent same day by next-day delivery Royal Mail Safebox™ to central laboratory; viral throat swab transferred to HPA South West for analysis

- Laboratory staff enter results on to web-based data system. Study team notified of results for research purposes only.
- Results not routinely available to clinicians.

Colour key:

 All centres

 Bristol only
